# Supplementary material for: Long-Term Results of Autologous Auricular Cartilage Graft Applied in Anophthalmic Orbits Unable to Wear Prosthesis
Source: J Ophthalmol. 2019 Apr 9;2019:7197063. doi: 10.1155/2019/7197063 (PMC6481011; doi:10.1155/2019/7197063)
Supplement: Supplementary Materials — In supplementary table S1, we show the database of our clinical study. This provides additional information regarding past histories, previous surgeries, and postoperative complications. [file 7197063.f1.xlsx]

## Sheet: Sheet1
ID	OP DATE	GENDER	AGE	T	Dr	PAST HX	PAST OP	LATERALITY	DX	P RETENTION	COMPLICATIONS	DONOR MORBILITY	REOP
1	2009-10-14	M	27	6	2721	TRAUMA	MAXILLOFACIAL SURGERY	OS	ECTROPION, SF	protrusion	NIL	NIL
2	2011-06-22	M	74	76	7236	TRAUMA	EVI+implant	OS	ECTROPION, SF	protrusion	nil	NIL
3	2013-06-27	M	87	6	7236	TRAUMA	SOCKET EXPANSION, FTSG	OS	SF	protrusion	GRANULOMA, P UPGAZE	NIL
4	2011-01-07	M	53	83	323	TRAUMA	ENU+implant+silicone injection	OD	ECTROPION, SF	protrusion	GRANULOMA, STILL SHALLOW	NIL	CG+tarsorrhaghy in 2011/1
5	2011-03-14	F	64	32	323	LEUKOMA K ON P	EVI+ implant+floor exposure in 2010/1/13	OS	BLEEDING SOCKET, SF, GRANULOMA	protrusion	STILL SHALLOW	NIL	2015/12/11 revision
6	2005-03-15	M	47	58	323	EXPOSURE HA IMPLANT	S/P FASCIA IN 2002	OD	ECTROPION, SF	protrusion	P PROTRUSION	NIL	2005/5 REVISION CARTILAGE; 2005/10 SCLERA GRAFT; 2008/11 CG, 2010 SEMI-EXENTERATION DUE TO SCC
7	1996-08-09	F	16	156	323	RB	ENU+implant+floor implant in 1999/8/7	OD	ECTROPION, SF	protrusion	SYMBLEPHARON	NIL	AMG IN 2009/10/5
8	2010-01-27	F	20	6	323	TRAUMA	ENO S/P ORBITAL DOUBLE IMPLANT	OD	ECTROPION, SF	protrusion	NIL	NIL
9	2010-04-01	M	63	6	323	ENDOPHTHLAMITIS	EVI+silicone implant exposure+ floor implant	OD	SF	protrusion	NIL
10	2010-07-07	M	11	84	323	MICROPHTHALMOS ON P	SNELLEN	OS	SF	protrusion	NIL	NIL
11	2009-01-20	M	42	82	323	TRAUMA, PTOSIS	FRONTALIS ADV IN 2008	OS	SF	protrusion	NIL	NIL
12	2009-03-24	F	26	44	323	CHOROIDAL MELANOMA	EN+ HA +RT	OS	ECTROPION, SF	protrusion	GRANULOMA IN 2M	NIL	DERMIS FAT GRAFT IN 100/5
13	2009-05-12	M	62	6	323	P for 10 yrs	LTS IN 2008 IN VAIN	OS	SF	protrusion	GRANULOMA IN 2M	NIL
14	2009-07-13	F	48	93	323	P for 30 yrs		OD	SF	protrusion	thickness	nil
15	2009-10-14	F	66	6	323	TRAUMA	ORBITAL FLOOR AUG IN 2002	OS	SF	protrusion	NIL	NIL
16	2009-12-08	M	46	9	323	EYEBALL RUP+IOFB+NPC S/P RT	EVI+implant	OS	SF	protrusion	NIL NI	NIL
17	2008-01-23	F	21	73	323	RB	ENU+implant migration, 2 implant	OS	SF	protrusion	NIL	NIL
18	2008-02-19	F	72	87	323	EYEBALL RUP	EVI+implant	OS	ECTROPION, SF	protrusion	NIL	NIL
19	2008-08-13	F	10	108	323	MICROPHTHALMOS ON P	ENTROPION S/P SNELLEN IN 2004	OD	SF, CHEEK HYPOPLASIA	protrusion	NIL	NIL
20	2007-09-18	M	38	19	323	EYEBALL RUP, L/W		OS	PESS, SF	protrusion	GRANULOMA	NIL
21	2006-02-01	F	53	6	323	AUTO-ENU(ou) IN MK80, L/W(od)	dermis fat graft, ou in 1991	OD	ECTROPION, SF	protrusion	P UPGAZE	nil
22	1995-05-26	F	50	159	323	EYEBALL RUP	EVI, FTSG+CG in 1995, OMT(u) in 1996	OD	ECTROPION, SF	protrusion	STILL SHALLOW, P PROTRUSION	NIL	CG in 2006/9, 2008/7
23	2005-01-10	M	54	15	323	trauma	UNKNOWN	OD	SF	protrusion	GRANULOMA IN 5W	NIL
24	2003-01-21	F	48	154	323	trauma	UNKNOWN	OD	SF	protrusion	NIL	NIL
25	2006-07-05	F	20	64	2721	RB S/Penu at 3 y/o	eno s/p HA in 2006/5, s/p floor implant in 2008/8	OS	SF	protrusion	NIL	NIL	HA exposure s/p SG+ IT mem graft in 2009/2
26	2013-04-15	F	37	11	2721	TRAUMA		OS	ECTROPION, SF	protrusion	NIL	NIL
27	2013-08-28	F	24	23	2721	optic glioma s/p craniotomy to remove tumor +RT in 1992		OD	Contracture socket with SF	protrusion	NIL	NIL
28	2011-08-18	M	59	43	2721	trauma		OS	Flaccid lid, EC, SF	protrusion	NIL	NIL
29	2011-12-14	M	58	6	3152	trauma in childhood	s/p evi+HA in 2000	OD	Flaccid lid, EC, SF	protrusion	NIL	NIL
